# Supplementary material
Source: MDPI journal article supplement (https://www.mdpi.com/2304-6775/7/1/1)
Supplement: s1 [file s1]

*Supplementary Material to:*

## **Peer Review of Reviewers: The Author's Perspective**

**Ivana Drvenica <sup>1</sup>, Giangiacomo Bravo <sup>2</sup>, Lucija Vejmelka <sup>3</sup>,  
Aleksandar Dekanski <sup>4</sup> and Olgica Nedić <sup>5,\*</sup>**

<sup>1</sup> Institute for Medical Research, University of Belgrade, Serbia; ivana.drvenica@imi.bg.ac.rs

<sup>2</sup> Department of Social Studies and Centre for Data Intensive Sciences and Applications, Linnaeus University, Växjö, Sweden; giangiacomo.bravo@lnu.se

<sup>3</sup> Faculty of Law, Department of Social Work, University of Zagreb, Croatia; lucijav@gmail.com

<sup>4</sup> Institute of Chemistry, Technology and Metallurgy, Department of Electrochemistry, University of Belgrade, Serbia; dekanski@ihtm.bg.ac.rs

<sup>5</sup> Institute for the Application of Nuclear Energy (INEP), University of Belgrade, Serbia; olgica@inep.co.rs

### **1. The Appearance of the On-Line Survey**

Depending on the number of reviewers who reviewed the manuscript (marked in response to the question: How many reports you have received?) the corresponding number of identical questionnaires was opened, one for each reviewer. Here is an example of the questionnaire in the case when there were two reviewers per paper.

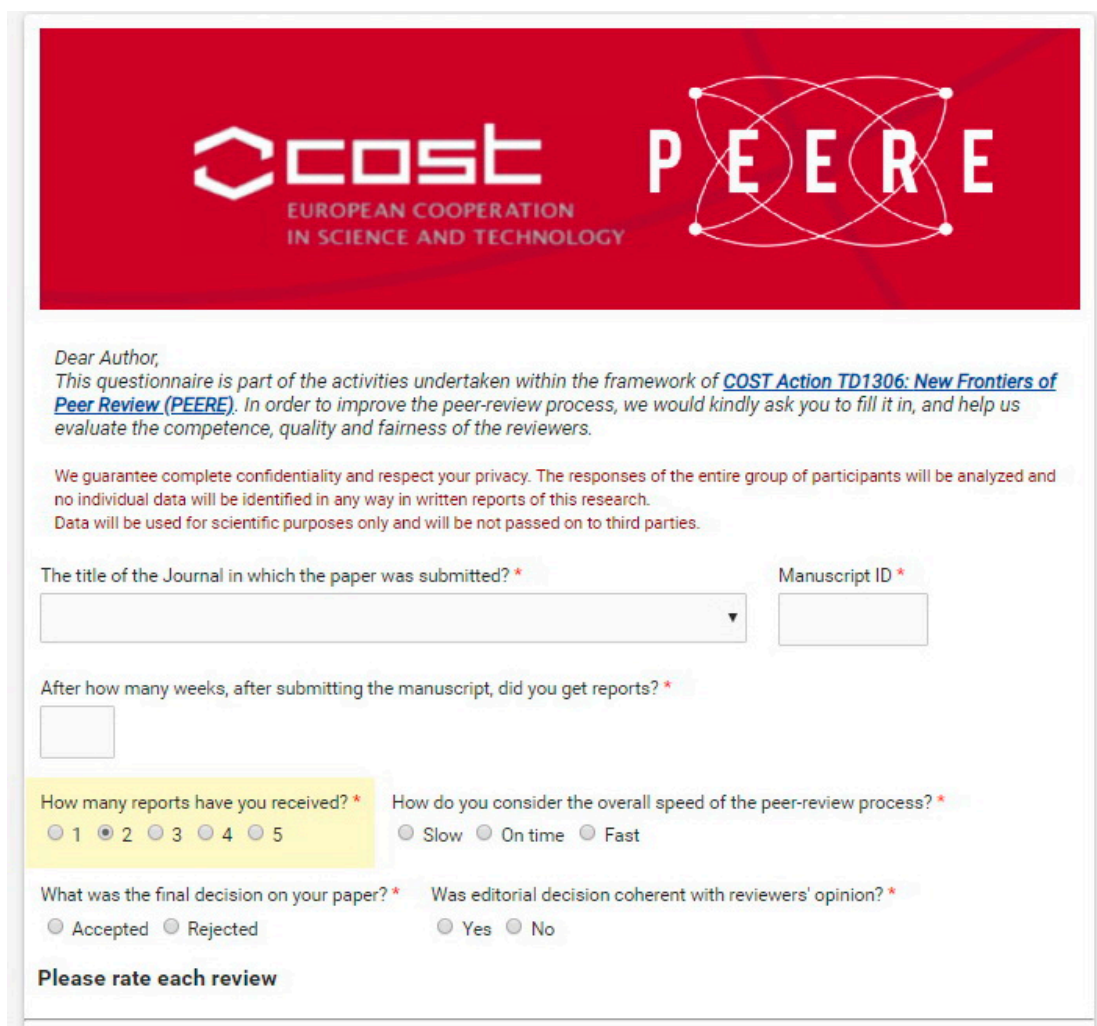

**cost**  
EUROPEAN COOPERATION  
IN SCIENCE AND TECHNOLOGY

**PEERE**

Dear Author,  
This questionnaire is part of the activities undertaken within the framework of [COST Action TD1306: New Frontiers of Peer Review \(PEERE\)](#). In order to improve the peer-review process, we would kindly ask you to fill it in, and help us evaluate the competence, quality and fairness of the reviewers.

We guarantee complete confidentiality and respect your privacy. The responses of the entire group of participants will be analyzed and no individual data will be identified in any way in written reports of this research.  
Data will be used for scientific purposes only and will be not passed on to third parties.

The title of the Journal in which the paper was submitted? \* Manuscript ID \*

After how many weeks, after submitting the manuscript, did you get reports? \*

How many reports have you received? \* How do you consider the overall speed of the peer-review process? \*

☐ 1 ☒ 2 ☐ 3 ☐ 4 ☐ 5 ☐ Slow ☐ On time ☐ Fast

What was the final decision on your paper? \* Was editorial decision coherent with reviewers' opinion? \*

☐ Accepted ☐ Rejected ☐ Yes ☐ No

**Please rate each review**

The appearance of the on-line survey – continuation

(If the answer on question: Did you have an impression that some non-scientific factor influenced the review and the final reviewer's suggestion? was YES, the author was able to choose a predefined factor or to add his/her own.)

**Review 1** (please indicate reviewers ID, for example: Reviewer A, Reviewer B, Reviewer 1...) \*

  
 Did the reviewer show a reasonable understanding of your work?  
 (1 - not at all ... 5 - fully) \*  
☐ 1 ☐ 2 ☐ 3 ☐ 4 ☐ 5  
 Do you think that reviewer was competent to review your paper?  
 (1 - not at all ... 5 - fully competent) \*  
☐ 1 ☐ 2 ☐ 3 ☐ 4 ☐ 5  
 According to your estimation, did the reviewer carefully and thoroughly read the paper?  
 (1 - not at all ... 5 - yes, very carefully and thoroughly) \*  
☐ 1 ☐ 2 ☐ 3 ☐ 4 ☐ 5  
 Were the reviewer's comments clear?  
 (1 - not at all ... 5 - yes, completely clearly) \*  
☐ 1 ☐ 2 ☐ 3 ☐ 4 ☐ 5  
 Did reviewer's comments, suggestions... help you to improve the quality of the paper?  
 (1 - not at all ... 5 - yes, very much) \*  
☐ 1 ☐ 2 ☐ 3 ☐ 4 ☐ 5  
 If you wish, please state how?  
  
 0/400 characters  
 Do you think that reviewer's comments, suggestions .... will be useful for your upcoming research?  
 (1 - not at all ... 5 - yes, very useful) \*  
☐ 1 ☐ 2 ☐ 3 ☐ 4 ☐ 5  
 According to your impression, did the reviewer dedicate sufficient time to review?  
 (1 - not at all ... 5 - adequate time) \*  
☐ 1 ☐ 2 ☐ 3 ☐ 4 ☐ 5  
 Did the reviewer point to some literature data that you were not aware of? \*  
☐ Yes, it was useful ☐ Yes, but it was useless ☐ No  
 Did you have an impression that some non-scientific factor influenced the review and the final reviewer's suggestion (gender, country or institution of origin, possible personal knowledge of the author ....) \*  
☐ No ☒ Yes  
 Which factor(s)? \*  
☐ Institution of origin ☐ Country of origin ☐ Different conceptual approach  
☐ Gender ☐ Personal reasons ☐ Competitiveness  
☐ Religion ☐ Ethnicity ☐ Other:   
 Please give an overall assessment grade of the reviewer  
 (1 - Bad .... 10 - Excellent) \*  
☐ 1 ☐ 2 ☐ 3 ☐ 4 ☐ 5 ☐ 6 ☐ 7 ☐ 8 ☐ 9 ☐ 10

The appearance of the on-line survey – continuation

**Review 2** (please indicate reviewers ID, for example: Reviewer A, Reviewer B, Reviewer 1...) \*

Did the reviewer show a reasonable understanding of your work?

(1 - not at all ... 5 - fully) \*

☐ 1 ☐ 2 ☐ 3 ☐ 4 ☐ 5

Do you think that reviewer was competent to review your paper?

(1 - not at all ... 5 - fully competent) \*

☐ 1 ☐ 2 ☐ 3 ☐ 4 ☐ 5

According to your estimation, did the reviewer carefully and thoroughly read the paper?

(1 - not at all ... 5 - yes, very carefully and thoroughly) \*

☐ 1 ☐ 2 ☐ 3 ☐ 4 ☐ 5

Were the reviewer's comments clear?

(1 - not at all ... 5 - yes, completely clearly) \*

☐ 1 ☐ 2 ☐ 3 ☐ 4 ☐ 5

Did reviewer's comments, suggestions .... help you to improve the quality of the paper?

(1 - not at all ... 5 - yes, very much) \*

☐ 1 ☐ 2 ☐ 3 ☐ 4 ☐ 5

If you wish, please state how?

0/400 characters

Do you think that reviewer's comments, suggestions .... will be useful for your upcoming research?

(1 - not at all ... 5 - yes, very useful) \*

☐ 1 ☐ 2 ☐ 3 ☐ 4 ☐ 5

According to your impression, did the reviewer dedicate sufficient time to review?

(1 - not at all ... 5 - adequate time) \*

☐ 3 ☐ 5 ☐ 2 ☐ 4 ☐ 1

Did the reviewer point to some literature data that you were not aware of? \*

☐ No ☐ Yes, it was useful ☐ Yes, but it was useless

Did you have an impression that some non-scientific factor influenced the review and the final reviewer's suggestion (gender, country or institution of origin, possible personal knowledge of the author ....) \*

☐ No ☐ Yes

Please give an overall assessment grade of the reviewer

(1 - Bad .... 10 - Excellent) \*

☐ 1 ☐ 2 ☐ 3 ☐ 4 ☐ 5 ☐ 6 ☐ 7 ☐ 8 ☐ 9 ☐ 10

Do you think you will submit an article again to this journal? \*

☐ Yes ☐ No

Additional comments:

0/250 characters

Enter the word in the image \*

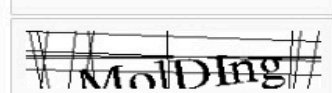

SUBMIT

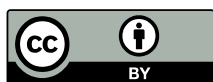

© 2018 by the authors. Submitted for possible open access publication under the terms and conditions of the Creative Commons Attribution (CC BY) license (<http://creativecommons.org/licenses/by/4.0/>).
